# Supplementary material for: Synthetic Evaluation of Standard and Microwave-Assisted Solid Phase Peptide Synthesis of a Long Chimeric Peptide Derived from Four Plasmodium falciparum Proteins
Source: PubMed Central journal article supplement (PMC6278645; doi:10.3390/molecules23112877), 2018-11-05
Supplement: molecules-23-02877-s001.pdf [file molecules-23-02877-s001.pdf]

## Supplementary Materials: Synthetic Evaluation of Standard and Microwave-Assisted Solid Phase Peptide Synthesis of a Long Chimeric Peptide Derived from Four Plasmodium falciparum Proteins

Yahson F. Varela, Magnolia Vanegas Murcia and Manuel Elkin Patarroyo.

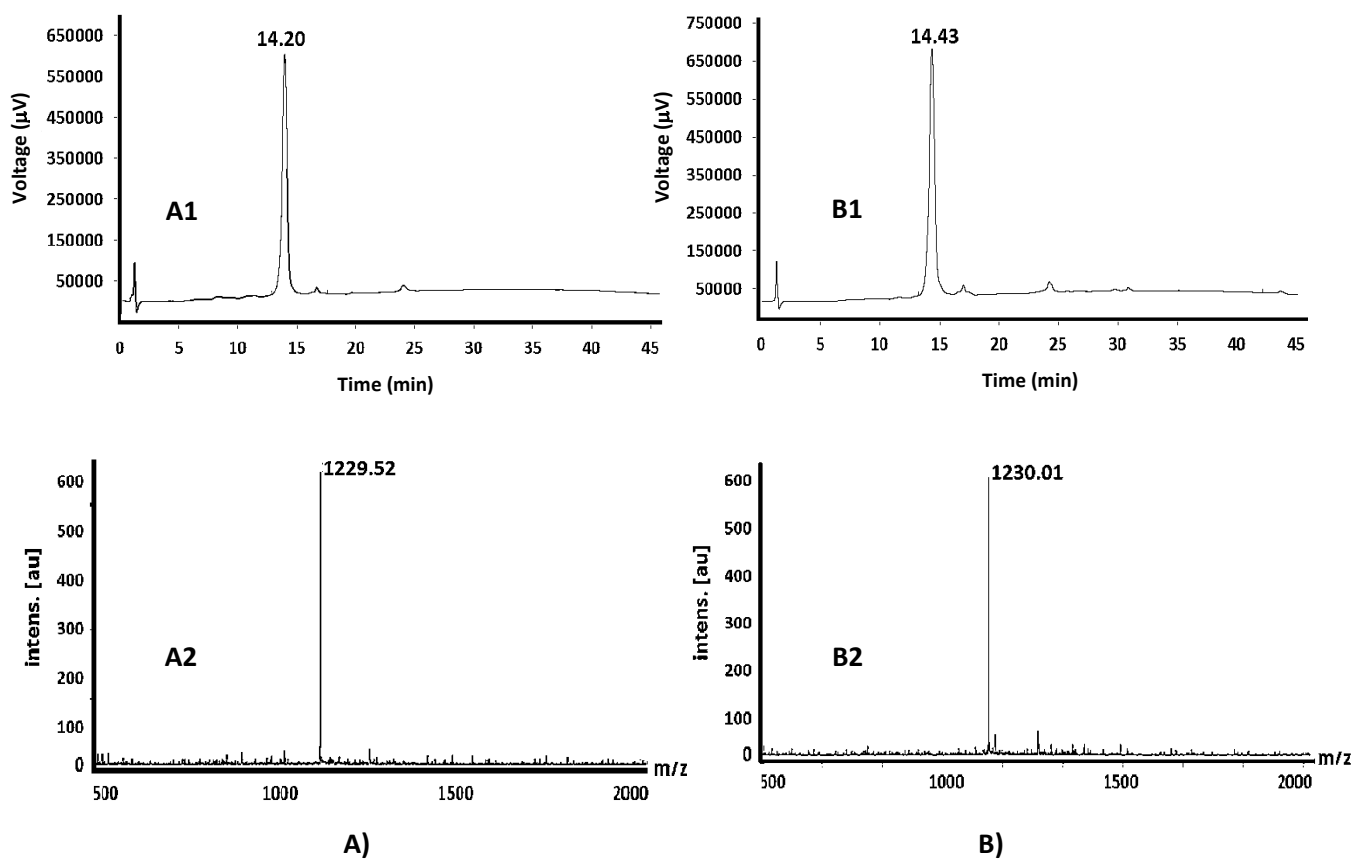

Figure S1. Chromatographic profiles of crude peptide's 11<sup>th</sup> residue and mass spectrum (1,228 Da theoretical) from standard (panel A1 and A2) and microwave-assisted reaction conditions (panel B1 and B2).

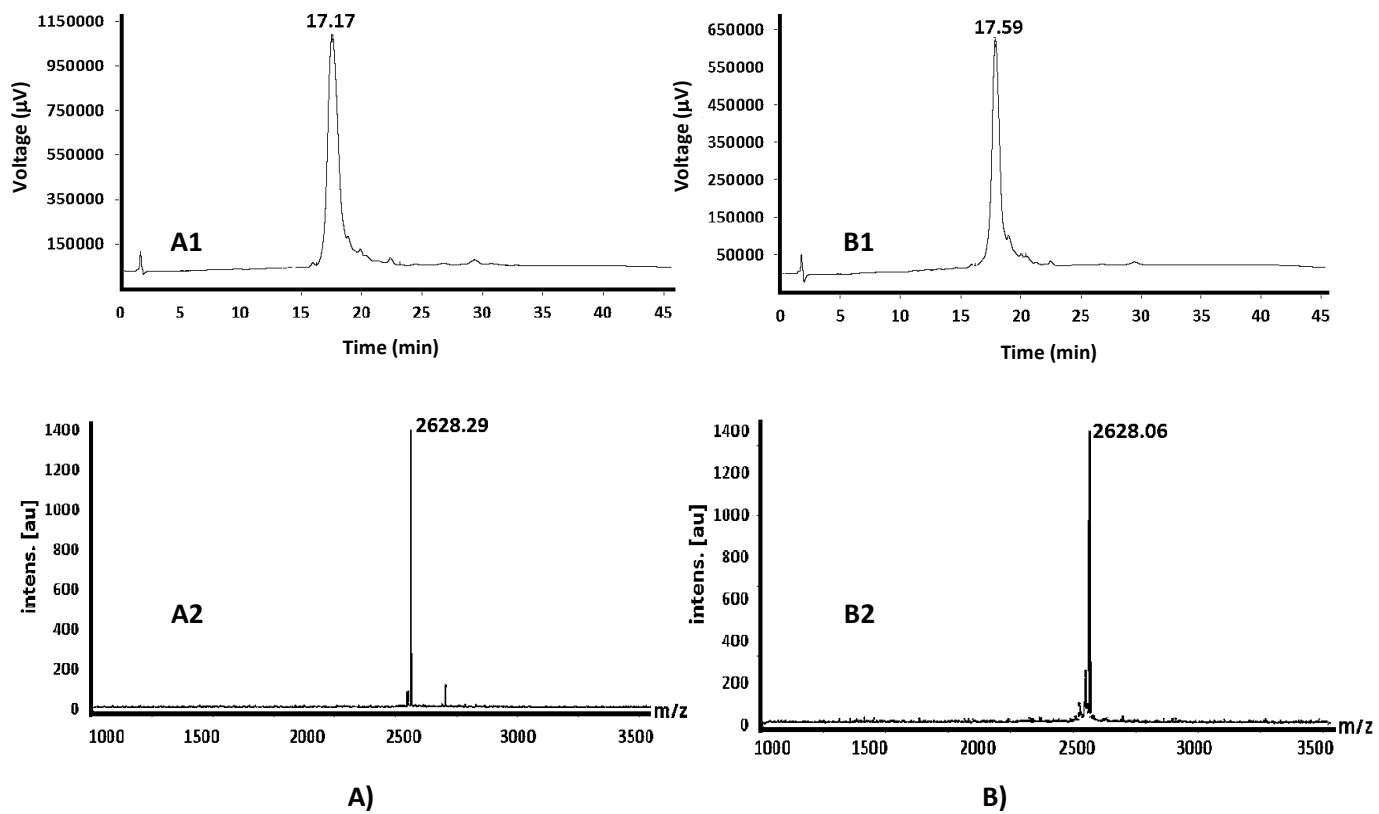

Figure S2. Chromatographic profiles of crude peptide's 22<sup>nd</sup> residue and mass spectrum (2,628.16 Da theoretical) from standard (panel A1 and A2) and microwave-assisted reaction conditions (panel B1 and B2).

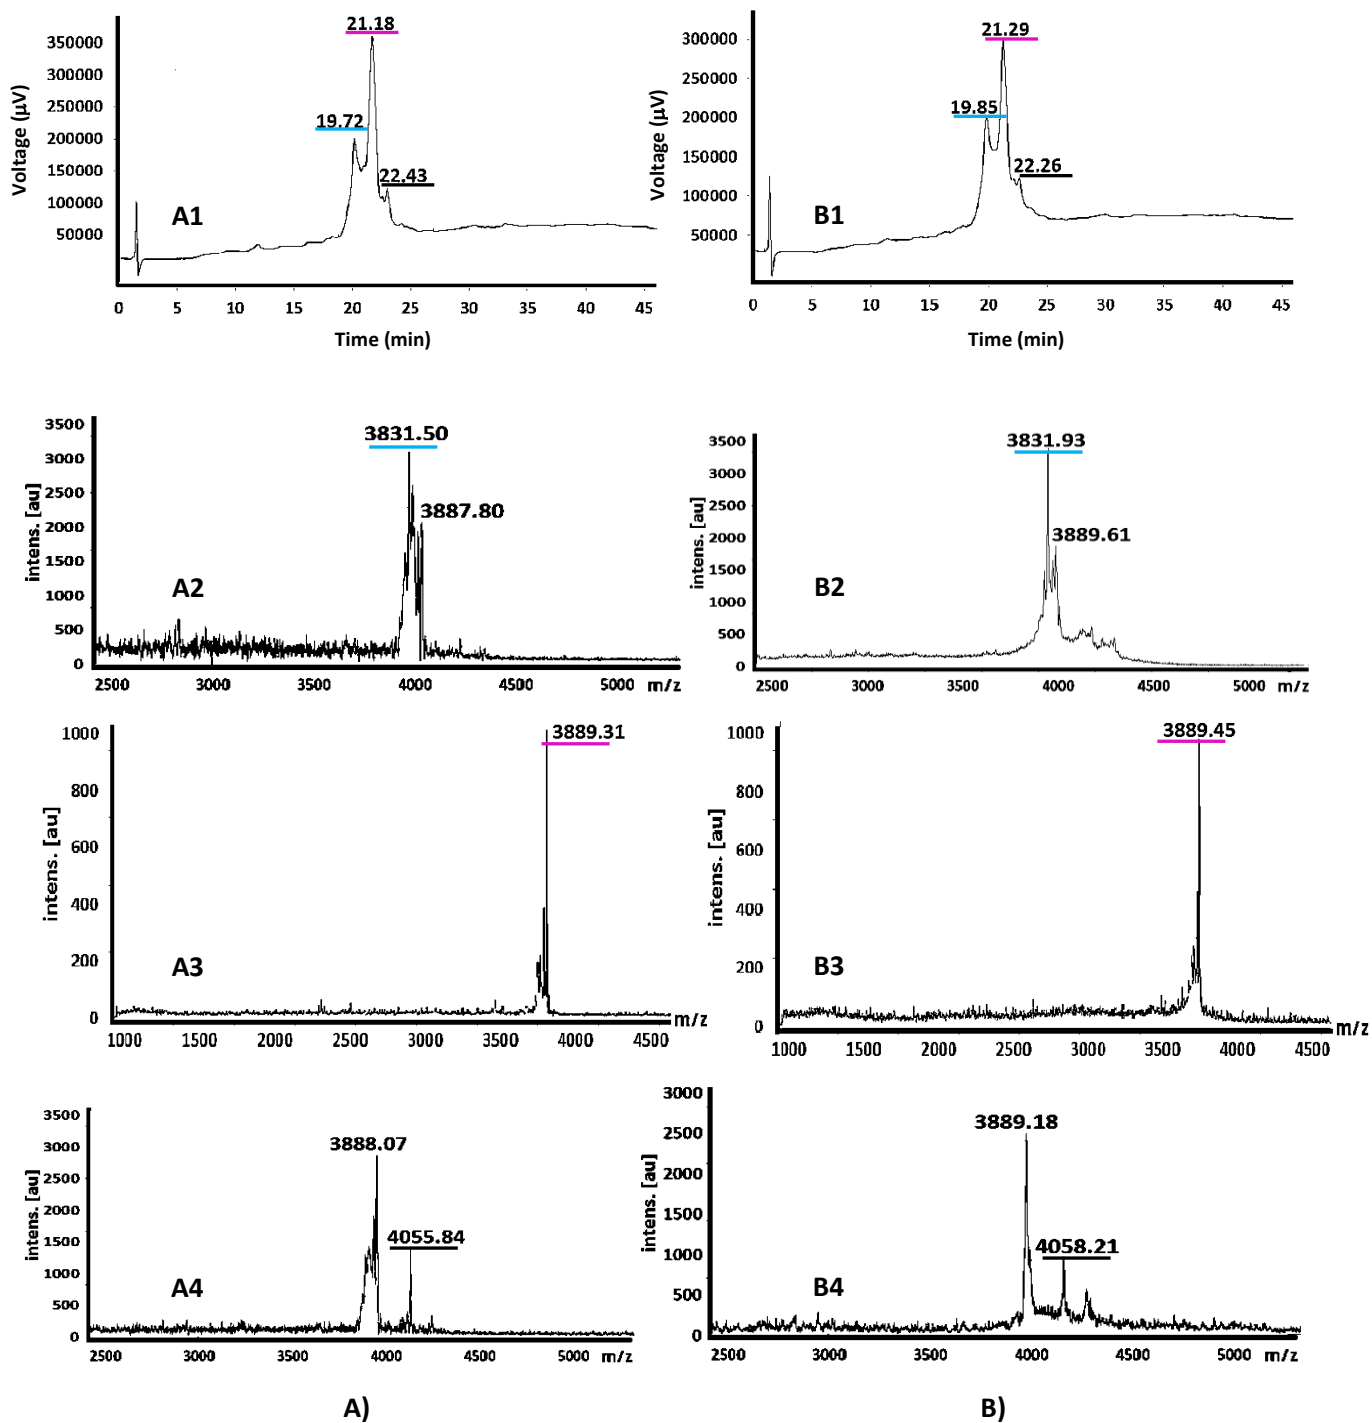

Figure S3. Chromatographic profiles of crude peptide's 33<sup>rd</sup> residue (3,887.86 Da theoretical) from standard (panel A1) and microwave-assisted reaction conditions (panel B1) and mass spectra for fractions for every peak in the chromatogram (A2 and B2, blue labelled  $t_R$ ; A3 and B3, violet labelled  $t_R$ ; and A4 and B4, black labelled)

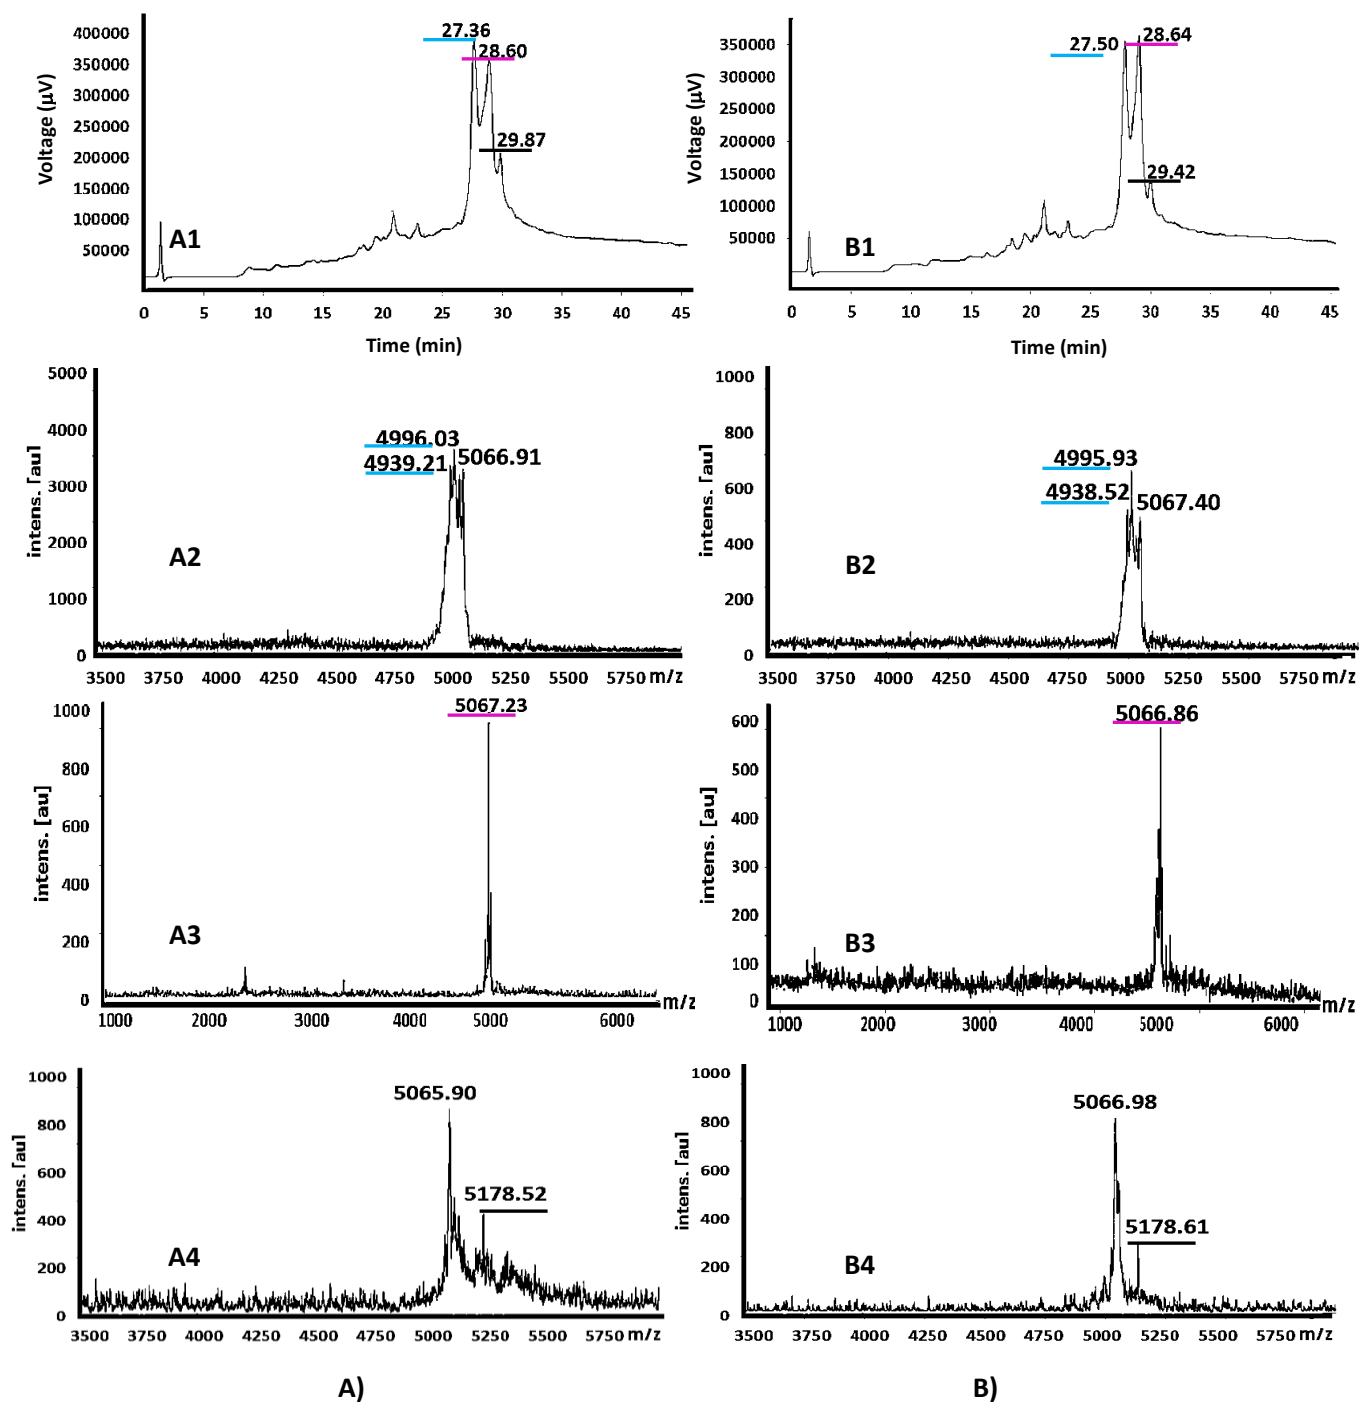

Figure S4. Chromatographic profiles of crude peptide's 44<sup>th</sup> residue (5,065.51 Da theoretical) from standard (panel A1) and microwave-assisted reaction conditions (panel B1) and mass spectra of fractions for every peak in the chromatogram (A2 and B2, blue labelled  $t_R$ ; A3 and B3, violet labelled  $t_R$ ; and A4 and B4, black labelled)

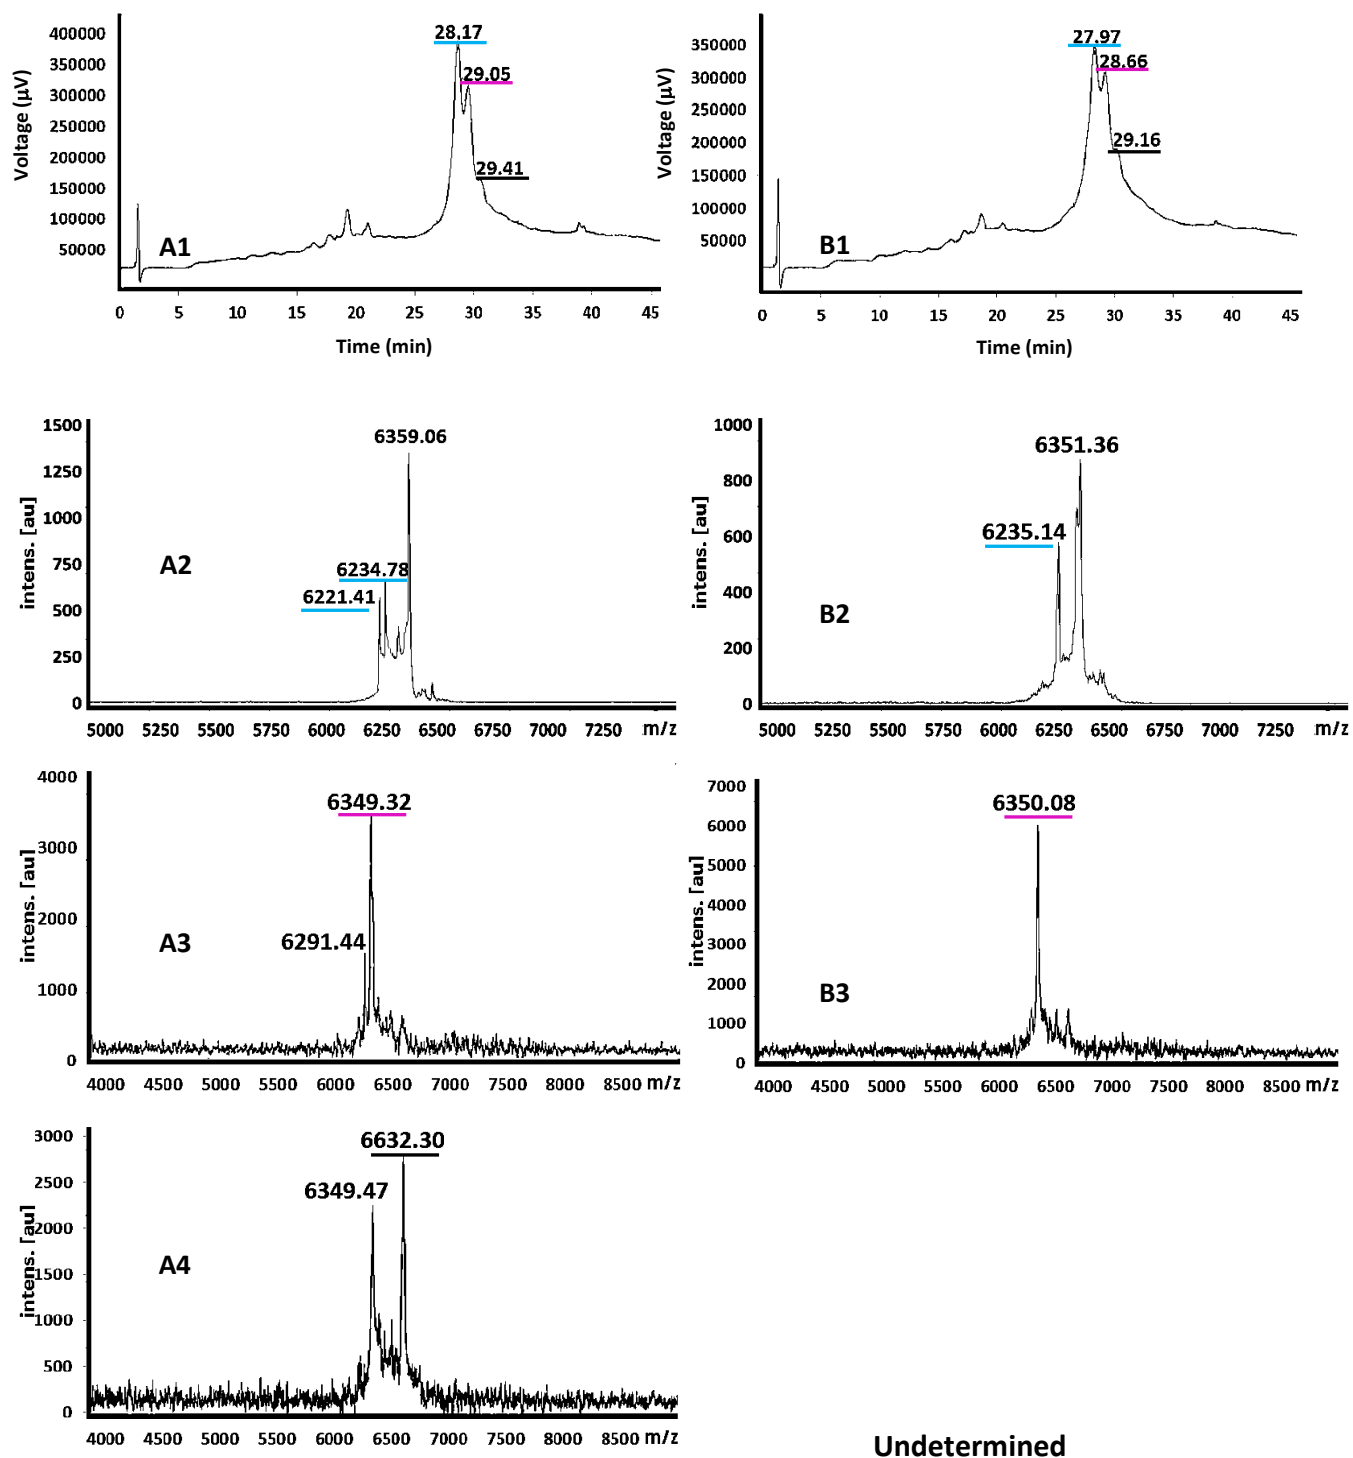

Figure S5. Chromatographic profiles of crude peptide's 57<sup>th</sup> residue (6,348.07 Da theoretical) from standard (panel A1) and microwave-assisted reaction conditions (panel B1) and mass spectra of fractions for every peak in the chromatogram (A2 and B2, blue labelled  $t_R$ ; A3 and B3, violet labelled  $t_R$ ; and A4, black labelled  $t_R$ )

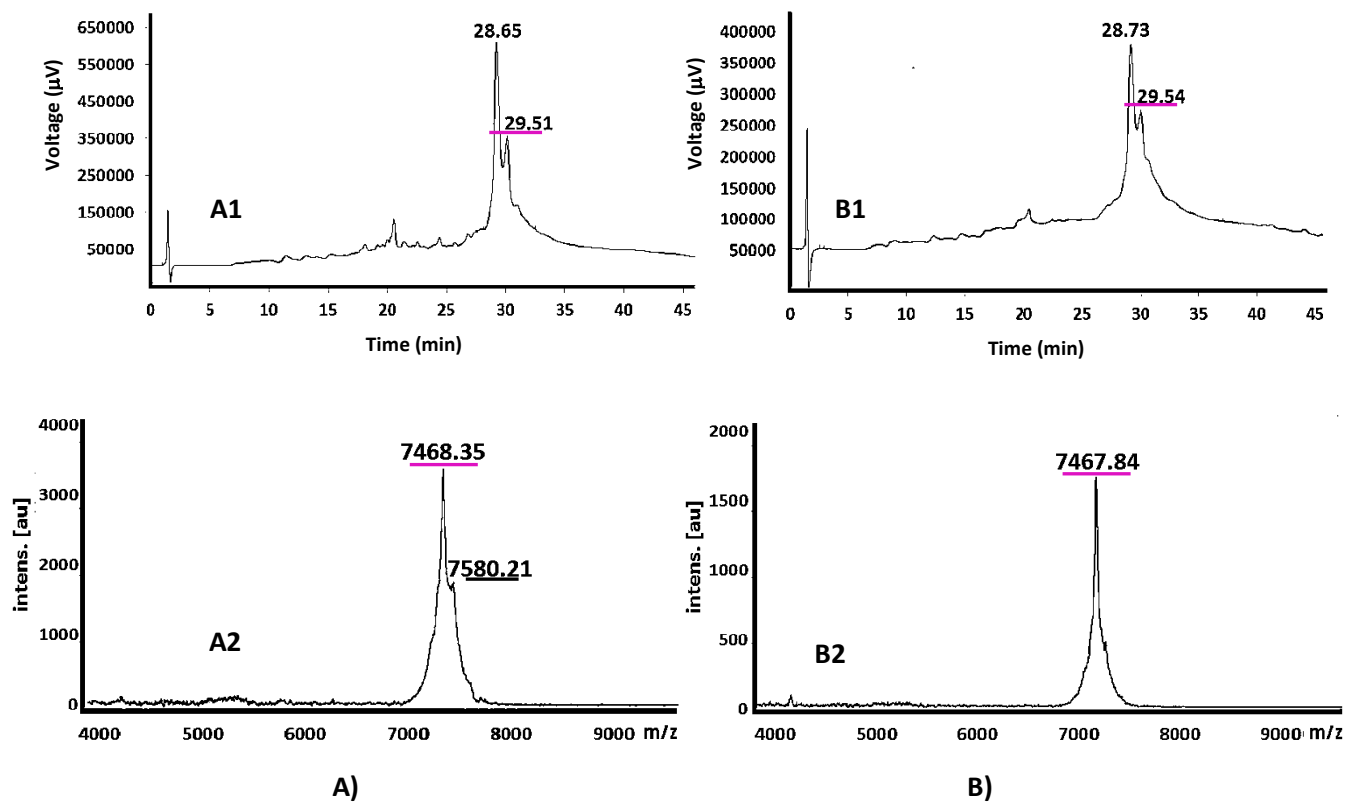

Figure S6. Chromatographic profiles of crude peptide's 66<sup>th</sup> residue (7,467.68 Da theoretical) from standard (panel A1) and microwave-assisted reaction conditions (panel B1) and mass spectra of fractions for every peak violet labelled in the chromatogram (A2 and B2, labelled  $t_R$ )

**Table S1. Molecular weight calculated for chimeric peptide and intermediary peptides**

| Residue number | Mono-isotopic molecular weight (Da) | Sequence                                                                           |
|----------------|-------------------------------------|------------------------------------------------------------------------------------|
| 11             | 1,228.53                            | NYEEQPHISGG                                                                        |
| 22             | 2,628.16                            | MTDVNRYRYSNNYEEQPHISGG                                                             |
| 23             | 2,685.18                            | GMTDVNRYRYSNNYEEQPHISGG                                                            |
| 24             | 2,742.20                            | GGMTDVNRYRYSNNYEEQPHISGG                                                           |
| 25             | 2,871.25                            | EGGMTDVNRYRYSNNYEEQPHISGG                                                          |
| 26             | 2,984.33                            | LEGGMTDVNRYRYSNNYEEQPHISGG                                                         |
| 30             | 3,481.66                            | LKKQLEGGMTDVNRYRYSNNYEEQPHISGG                                                     |
| 33             | 3,887.86                            | YRSLKKQLEGGMTDVNRYRYSNNYEEQPHISGG                                                  |
| 35             | 4,043.95                            | GVYRSLKKQLEGGMTDVNRYRYSNNYEEQPHISGG                                                |
| 36             | 4,114.99                            | AGVYRSLKKQLEGGMTDVNRYRYSNNYEEQPHISGG                                               |
| 39             | 4,424.19                            | VPLAGVYRSLKKQLEGGMTDVNRYRYSNNYEEQPHISGG                                            |
| 44             | 5,065.51                            | EVLYHVPLAGVYRSLKKQLEGGMTDVNRYRYSNNYEEQPHISGG                                       |
| 50             | 5,513.68                            | GGGYGGEVLYHVPLAGVYRSLKKQLEGGMTDVNRYRYSNNYEEQPHISGG                                 |
| 57             | 6,348.07                            | DYQAPFLGGGYGGEVLYHVPLAGVYRSLKKQLEGGMTDVNRYRYSNNYEEQPHISGG                          |
| 60             | 6,703.24                            | FHADYQAPFLGGGYGGEVLYHVPLAGVYRSLKKQLEGGMTDVNRYRYSNNYEEQPHISGG                       |
| 64             | 7,255.53                            | KHMRFHADYQAPFLGGGYGGEVLYHVPLAGVYRSLKKQLEGGMTDVNRYRYSNNYEEQPHISGG                   |
| 66             | 7,467.68                            | VIKHMRFHADYQAPFLGGGYGGEVLYHVPLAGVYRSLKKQLEGGMTDVNRYRYSNNYEEQPHISGG                 |
| 77             | 8,488.15                            | LGENPNANPGGVIKHMRFHADYQAPFLGGGYGGEVLYHVPLAGVYRSLKKQLEGGMTDVNRYRYSNNYEEQPHISGG      |
| 82             | 9,051.42                            | KNSFSLGENPNANPGGVIKHMRFHADYQAPFLGGGYGGEVLYHVPLAGVYRSLKKQLEGGMTDVNRYRYSNNYEEQPHISGG |

The online *Peptide mass calculator* (<http://www.ionsource.com/programs/PEPCALC.HTM>) was used for calculating the above molecular weights

**Table S2: Molecular weights calculated for amino acid and tert-butylated residues**

| Three- and one-letter code |   | Average molecular weight (Da) | Three- and one-letter code |   | Average molecular weight (Da) |
|----------------------------|---|-------------------------------|----------------------------|---|-------------------------------|
| Gly                        | G | 57.05                         | Asp                        | D | 115.10                        |
| Ala                        | A | 71.08                         | Gln                        | Q | 128.10                        |
| Ser                        | S | 87.08                         | Lys                        | K | 128.20                        |
| Pro                        | P | 97.12                         | Glu                        | E | 129.10                        |
| Val                        | V | 99.07                         | Met                        | M | 131.20                        |
| Thr                        | T | 101.10                        | His                        | H | 137.10                        |
| Cys                        | C | 103.10                        | Phe                        | F | 147.20                        |
| Leu                        | L | 113.20                        | Arg                        | R | 156.20                        |
| Ile                        | I | 113.20                        | Tyr                        | Y | 163.20                        |
| Asn                        | N | 114.10                        | Trp                        | W | 186.20                        |

| Number of tert-butylated residues | Average molecular weight (Da) |
|-----------------------------------|-------------------------------|
| 1                                 | 56.10                         |
| 2                                 | 112.20                        |
| 3                                 | 168.30                        |
| 4                                 | 224.40                        |
| 5                                 | 280.50                        |
| 6                                 | 336.60                        |
